# Supplementary material
Source: PubMed Central journal article supplement (PMC5675731)
Supplement: NIHMS909706-supplement-1.pdf [file NIHMS909706-supplement-1.pdf]

**Table S1. Related to Figure 4.** Sup35 and Rnq1 mutations isolated from genetic screen and their activities

| <b>Sup35 mutations</b> | <b>Frequency out of 24 seqs.</b> | <b>Heritable [<i>PSI</i>+ ] curing?</b> | <b>Increase sensor solubility during overexpression?</b> |
|------------------------|----------------------------------|-----------------------------------------|----------------------------------------------------------|
| Q15-R, K139-I, Q242-R  | 4                                | Yes                                     | Yes                                                      |
| Q18-R, Y32-H           | 2                                | Some (1-10%)                            | Yes                                                      |
| Q61-L                  | 2                                | Yes                                     | Yes                                                      |
| Q10-R, Q24-R, D500-V   | 2                                | Some (1-10%)                            | Yes                                                      |
| Q10-P, N229-D, H613-R  | 1                                | Some (1-10%)                            | Yes                                                      |
| N8-D, Q70-R, A237-T    | 1                                | Yes                                     | Yes                                                      |
| N8-I, V246-A           | 1                                | Some (1-10%)                            | Yes                                                      |
| S17-R, Q56-R           | 1                                | Yes                                     | Yes                                                      |
| Q15-R, P65-S           | 1                                | Yes                                     | Yes                                                      |
| Y46-C, Q95-L           | 1                                | Yes                                     | Yes                                                      |
| Q15-R, I152-T, I675-M  | 1                                | Yes                                     | Yes                                                      |
| S17-R, L521-Q, L569-V  | 1                                | Yes                                     | Yes                                                      |
| Q22-R                  | 1                                | Yes                                     | Yes                                                      |
| Q15-R                  | 1                                | Yes                                     | Yes                                                      |
| G20-D, N321-S          | 1                                | Some (1-10%)                            | Yes                                                      |
| Q15-R, N437-Y          | 1                                | Yes                                     | Yes                                                      |
| G25-D                  | 1                                | Some (1-10%)                            | Yes                                                      |
| Q10-R                  | 1                                | Yes                                     | Yes                                                      |

| <b>Rnq1 mutations</b> | <b>Frequency out of 24 seqs.</b> | <b>Heritable [<i>RNQ</i>+ ] curing?</b> | <b>Increase sensor solubility during overexpression?</b> |
|-----------------------|----------------------------------|-----------------------------------------|----------------------------------------------------------|
| L91-P                 | 6                                | No                                      | No                                                       |
| L138-P, stop 313      | 5                                | Yes                                     | Yes                                                      |
| V100-G, A69-T         | 4                                | No                                      | Yes                                                      |
| L97-F, R112-G, G149-S | 4                                | No                                      | Yes                                                      |
| F214-L, Δ288-298      | 2                                | Yes                                     | Yes                                                      |
| S8-P, Y256-C          | 1                                | No                                      | Yes                                                      |
| S241-G                | 1                                | No                                      | No                                                       |
| S12-P, S241-G         | 1                                | No                                      | No                                                       |

During selection, these mutants were expressed from endogenous promoters. Solubilizing activity may exist at that level of expression.
